# Supplementary material
Source: PubMed Central journal article supplement (PMC11461014)
Supplement: NIHMS2023848-supplement-Supplemental_Figures.pdf [file NIHMS2023848-supplement-Supplemental_Figures.pdf]

Supplementary Materials for  
**Dynamic load modulation predicts right heart tolerance of left ventricular  
cardiovascular assist in a porcine model of cardiogenic shock**

Kimberly K. Lamberti *et al.*

Corresponding author: Elazer R. Edelman, ere@mit.edu

*Sci. Transl. Med.* **16**, eadk4266 (2024)  
DOI: 10.1126/scitranslmed.adk4266

**The PDF file includes:**

Figs. S1 to S3

**Other Supplementary Material for this manuscript includes the following:**

Data file S1  
MDAR Reproducibility Checklist

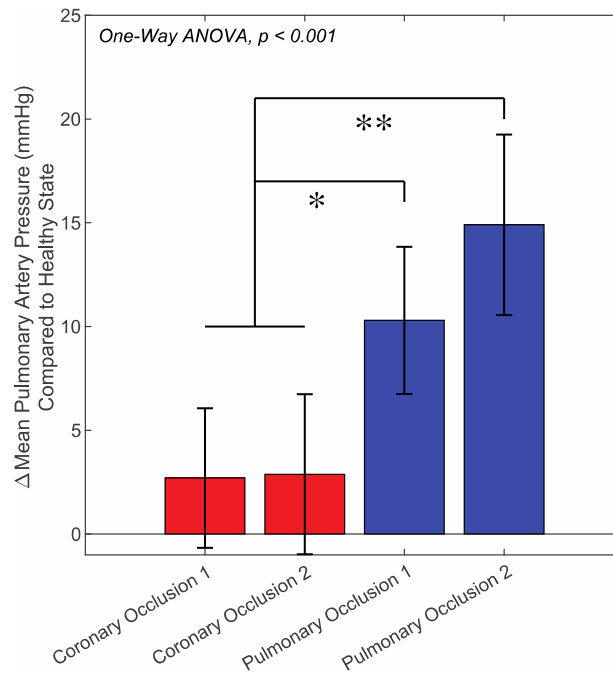

### Supplemental Figure 1: Model Produces Graded Effects on Pulmonary Vascular Load

Pulmonary vascular load was progressively impacted by graded left ventricular ischemia (n=5), generating post-capillary strain, followed by graded pulmonary microembolization (n=4). Error bars indicate standard deviation. \*  $p < 0.05$  and \*\*  $p < 0.01$ . Data were analyzed by one-way ANOVA with post-hoc Tukey honest significant difference test.

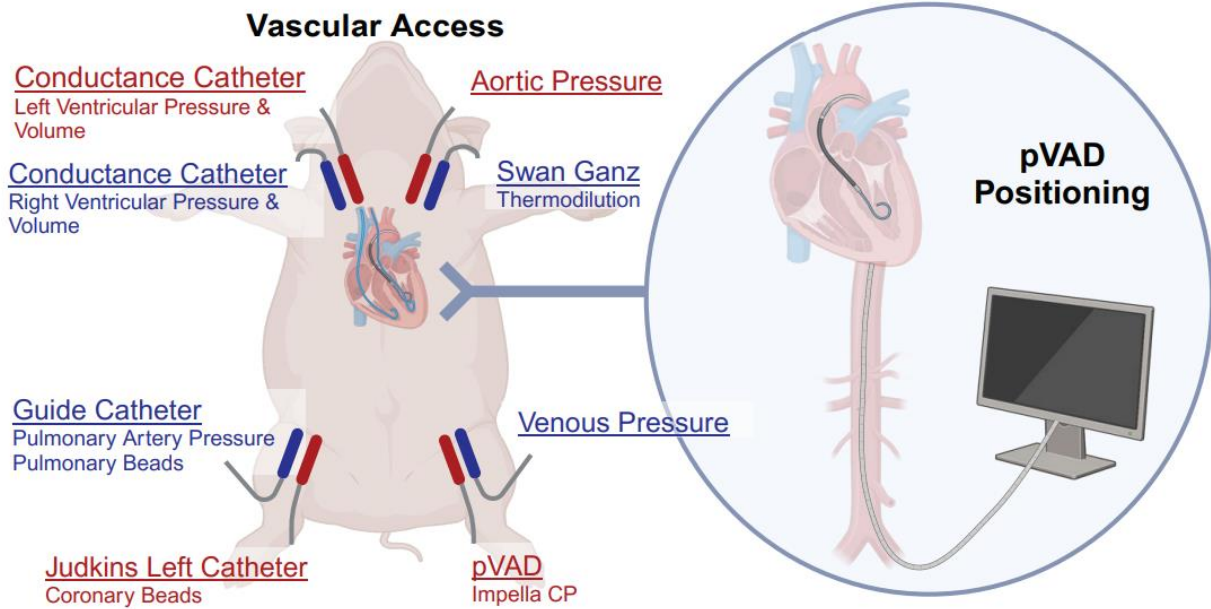

**Supplemental Figure 2: Vascular Access and pVAD Positioning**

Vascular access was obtained in the femoral arteries and veins, carotid arteries, and jugular veins of the animals. The pVAD is a catheter-mounted, transvalvular pump positioned across the aortic valve.

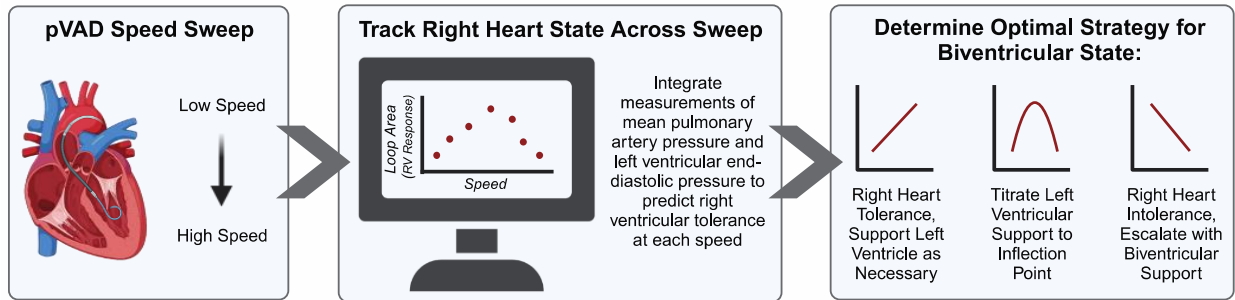

**Supplemental Figure 3: Schema for Right Ventricular Evaluation in Clinical Practice**

Right ventricular tolerance can be assessed using a pVAD speed sweep. The response is assessed using transpulmonary loop area, and three possible approaches for patient support can be taken based on the results.
